## THE MOSQUITO ELECTROCUTING TRAP AS AN EXPOSURE-FREE METHOD FOR MEASURING HUMAN BITING RATES BY *Aedes* MOSQUITO VECTORS

### AUTHORS:

Leonardo D. Ortega-López\*  [1, 2], Emilie Pondeville [2], Alain Kohl [2], Renato León [3],  
Mauro Pazmiño Betancourth [4], Floriane Almire [2], Sergio Torres-Valencia [3], Segundo  
Saldarriaga [3], Nozrat Mirzai [5], Heather M. Ferguson [1].

### AFFILIATIONS:

[1] Institute of Biodiversity, Animal Health and Comparative Medicine, University of Glasgow,  
Glasgow G12 8QQ, UK. \* Corresponding author: [leinfloyd@yahoo.com](mailto:leinfloyd@yahoo.com).

 <https://orcid.org/0000-0002-0819-0721>

[2] MRC-University of Glasgow Centre for Virus Research, Glasgow G61 1QH, UK.

[3] Laboratorio de Entomología Médica & Medicina Tropical (LEMMT), Universidad San  
Francisco de Quito, Quito, EC170901, Ecuador.

[4] School of Engineering, University of Glasgow, Glasgow G12 8QQ, UK.

[5] Bioelectronics Unit, University of Glasgow, Glasgow G12 8QQ, UK.

## **ABSTRACT**

### ***Background***

Entomological monitoring of *Aedes* vectors has largely relied on surveillance of larvae, pupae and non-host-seeking adults, which have been poorly correlated with human disease incidence. Exposure to mosquito-borne diseases can be more directly estimated using Human Landing Catches (HLC), although this method is not recommended for *Aedes*-borne arboviruses. We evaluated a new method previously tested with malaria vectors, the Mosquito Electrocuting Trap (MET) as an exposure-free alternative for measuring landing rates of *Aedes* mosquitoes on people. Aims were to 1) compare the MET to the BG-sentinel (BGS) trap gold standard approach for sampling host-seeking *Aedes* vectors; 2) characterize the diel activity of *Aedes* vectors and their association with microclimatic conditions.

### ***Methods***

The study was conducted over 12 days in Quinindé – Ecuador in May 2017. Mosquito sampling stations were set up in the peridomestic area of four houses. On each day of sampling, each house was allocated either a MET or a BGS trap, which were rotated amongst the four houses daily in a Latin square design. Mosquito abundance and microclimatic conditions were recorded hourly at each sampling station between 07:00-19:00 hours to assess variation between

vector abundance, trapping methods, and environmental conditions. All *Aedes aegypti* females were tested for the presence of Zika (ZIKV), dengue (DENV) and chikungunya (CHIKV) viruses.

## **Results**

A higher number of *Ae. aegypti* females were found in MET than in BGS collections, although no statistically significant differences in mean *Ae. aegypti* abundance between trapping methods were found. Both trapping methods indicated female *Ae. aegypti* had bimodal patterns of host seeking, being highest during early morning and late afternoon hours. Mean *Ae. aegypti* daily abundance was negatively associated with daily temperature. No infection by ZIKV, DENV or CHIKV was detected in any *Aedes* mosquitoes caught by either trapping method.

## **Conclusion**

We conclude the MET performs at least as well as the BGS standard, and offers the additional advantage of direct measurement of *per capita* human biting rates. If detection of arboviruses can be confirmed in MET-collected *Aedes* in future studies, this surveillance method could provide a valuable tool for surveillance and prediction on human arboviral exposure risk.

## **KEYWORDS**

Zika; dengue; chikungunya; arbovirus; host seeking; *Aedes aegypti*; mosquito electrocuting trap; BG sentinel trap; vector surveillance; Ecuador.

## BACKGROUND

Mosquito-borne viruses (arboviruses) are an important cause of diseases in humans and animals. In 2017, estimates suggested that mosquitoes were responsible for approximately 137 millions human arboviral infections with dengue (DENV), chikungunya (CHIKV), and Zika virus (ZIKV) being the most important [1]. Arbovirus transmission to humans depends on multiple factors that involve spatial movement and immunity of human populations [2–7], socio-economic factors and access to basic services (especially water) [8–11], and the ecology and distribution of the mosquito vectors that transmit them [12–19]. These factors combine to determine the distribution and intensity of arboviral transmission, and generate often complex and highly heterogeneous patterns of exposure and infection [20,21]. As safe and effective vaccines for DENV, CHIKV and ZIKV viruses are not yet available [22–27], control of the *Aedes* mosquito vectors remains a primary strategy for reducing transmission [28–30].

Knowledge of where and when humans are at greatest risk of exposure to infected mosquito bites is vital for prediction of transmission intensity and effective deployment of vector control [31–34]. In the case of malaria, this information is used to estimate a time or site-specific “Entomological Inoculation Rate” (EIR); defined as the number of infected mosquito bites a person is expected to receive. This metric is usually derived from conducting Human Landing Catches (HLCs); a method in which a participant collects and counts the number of mosquito vectors landing on them over a given sampling period, then the sample is tested for the presence of a pathogen [35]. By providing a direct estimate of human exposure, the HLC provides sensitive

predictions of malaria transmission [32,36–40]. However, this method raises ethical concerns due to the requirement for human participants to expose themselves to potentially infectious mosquito bites [41]. In the case of malaria, this risk can be minimized by providing participants with prophylaxis [42]. However, such remediation is not possible for arboviruses where often no prophylaxis is available, and therefore HLCs are not recommended for the surveillance of *Aedes*-borne arboviruses [43,44].

Standard entomological monitoring for *Aedes* vectors is usually based on “exposure-free” surveillance of larvae or non-biting adults. This includes surveys of larvae or pupae in water containers [45–49], and collection of adult mosquitoes resting inside and/or around houses to indirectly estimate human-vector contact rates [45,50–53]. While such surveillance methods are useful for confirming vector abundance and distribution, they are poor predictors of epidemiological outcomes such as disease incidence and outbreak potential [54,55]. Consequently there is a need for vector sampling methods that can provide more reliable entomological indicators of arboviral transmission.

Human exposure to arboviral infection is likely best assessed by surveillance of “host seeking” (human-biting) *Aedes* mosquitoes. Several methods have used to sample host seeking *Aedes* including a variety of fan-operated traps that use visual attraction cues (*e.g.* Fay [56], the Fay-Prince trap [57], the black cylinder suction trap [58], duplex cone trap [59]) and lure-based traps. For the latter, artificial odours and attractants have been developed and tested for use in traps such as kairomone blends [60–67], BG-Lure® cartridges [68–70], and carbon dioxide (CO<sub>2</sub>)

[71]. Additionally other trapping methods have been developed that use live hosts as lures (*e.g.* animal-baited traps [72] and human-baited traps [85–87]). Only a few studies have directly compared such alternative trapping methods against the HLC with most being outperformed by the latter [74,75]. Out of all these methods, the BG-sentinel (BGS) trap has been demonstrated as one of the most effective and logistically feasible [76–81], and thus often considered a gold standard for *Aedes* surveillance [82,83]. In a range of trap evaluation studies, the BGS outperformed other methods for *Aedes* vectors with the exception of the HLC [84]. Despite these advantages of the BGS, its ability to accurately reflect the biting rates experienced by one person remains unclear. Consequently, there is still a need for a safe alternative for direct assessment of human biting rates.

Recently, a new Mosquito Electrocuting Trap (MET) was developed as an exposure-free alternative to the HLC for sampling malaria vectors [98–100]. Similar to the HLC, this sampling method also uses human participants to lure mosquito vectors and trap them. However, the MET provides participants with full protection from mosquito bites so that no exposure is required. The MET consists of four squared-shaped electrocuting surfaces that are assembled around the legs of a host, with the rest of their body being protected by netting. Host-seeking mosquitoes are attracted towards the host by odour and heat cues as normal, but are intercepted and killed before landing. In previous trials in Tanzania, the MET matched the performance of the HLC for sampling malaria vectors in rural and urban settings [85–87]. This trap has also been used to assess host preference by baiting with human and livestock hosts [87], although it has not yet been evaluated for sampling *Aedes* vectors. If successful in this context, the MET could

significantly improve ability to monitor and predict arboviral transmission by facilitating an exposure-free direct estimation of EIR.

This study reports the first evaluation of METs for sampling host-seeking *Aedes* vectors in a hotspot of DENV and ZIKV transmission in coastal region of Ecuador. This region is endemic for such arboviral diseases and has accounted for most of the cases reported in Ecuador. For instance, during the CHIKV outbreak in 2015, a total of 33,625 cases were reported in Ecuador, from which 96.02% was reported in the coastal region [88]. A similar pattern occurred during the ZIKV outbreak in 2016 and 2017, where approximately 98.49% of the cases were reported in this region from a total of 5,303 cases [89,90]. DENV has been reported every year in high numbers and considering 2016 and 2017, 84.78% of cases came from the coastal region from a total of 25,537 cases [90,91].

The objectives of this study were to: (1) evaluate the performance of the MET relative to the BGS trap for sampling host-seeking *Ae. aegypti* and other mosquitoes in the study area; and (2) use the MET to characterize the biting time of *Ae. aegypti* and other relevant mosquito species and their association with microclimatic conditions.

In addition, we took the opportunity to test for the presence of arboviruses in the collected *Aedes* females by both trapping methods to investigate arboviral transmission in the local area.

## METHODS

### *Location and Time of the Study*

This study was conducted in the neighbourhood of “Los Higuerones” (0°19’34”N, 79°28’02”W, 78 m.a.s.l), located in the city of Quinindé (Rosa Zárate) – Ecuador. This neighbourhood is located in an urban setting dominated by small, closely packed houses (Figure 1a), bordering the eastern side with the Blanco river (Figure 1b). Quinindé is located in the province of Esmeraldas, the northernmost province in the coastal region of Ecuador. During the 2015 outbreak of CHIKV, this province accounted with the highest disease burden in the country, with a total of 10,477 cases [88]. While for DENV, during 2016, Quinindé alone accounted for 52% of the cases within Esmeraldas province, with a total of 689 cases out of a total of 1,319. In 2017, the number of DENV cases in Quinindé was much lower compared with 2016, where only 87 cases were reported out of 334 in the province of Esmeraldas. Although there is a permanent incidence of arbovirus cases along the year, a higher incidence is usually reported during the first half of the year [11].

The study was carried out across 12 days in May 2017 (4<sup>th</sup>- 12<sup>th</sup>, and 16-18<sup>th</sup>). On each day of the study, mosquito sampling was conducted over 12 hours, from 07:00 – 19:00 hours. Mosquito sampling was conducted within the peri-domestic area (garden/yard) of four households (Figure 1b). These houses were selected on the basis of being physically accessible, and having residents present and willing to participate during an initial tour of the area with a local guide. Houses were separated by approximately 90 metres from one another.



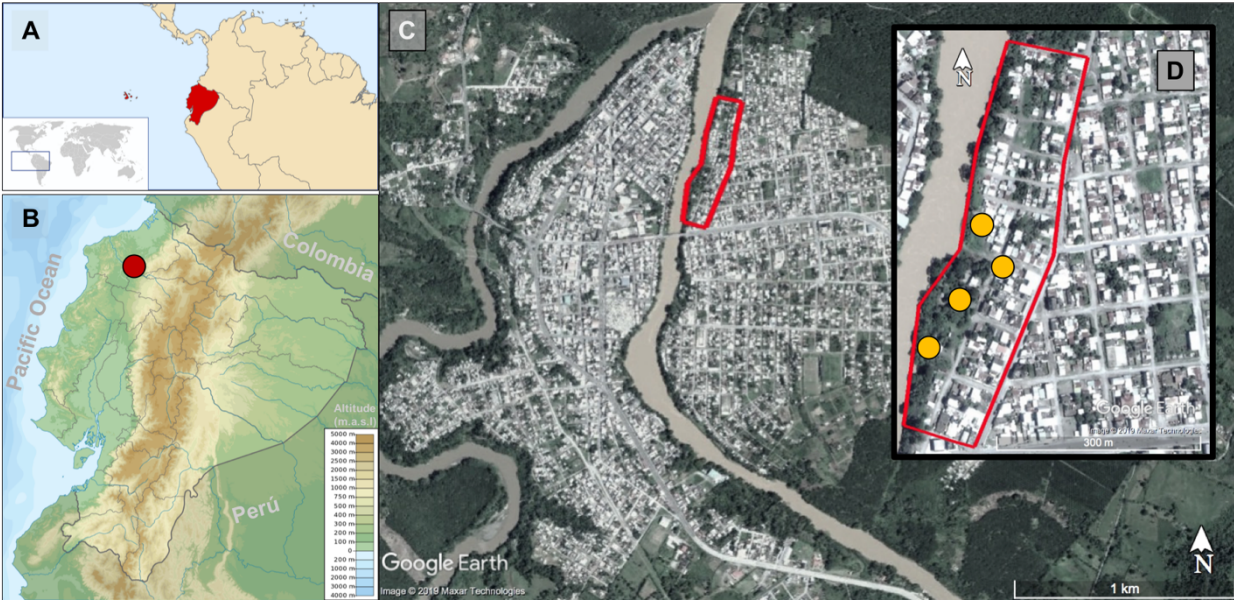

**Figure 1. View of the urban area of the city of Quindé.** (a) Location of Ecuador in the Americas highlighted in red (Taken from [92]). (b) Location of the city of Quindé in the Pacific Coastal region, spotted by the red circle. (c) City of Quindé showing Los Higuerones neighbourhood enclosed by the red line. (d) Enlarged view of Los Higuerones with the houses sampled spotted by the orange circles.

### ***Trapping Methods***

Over the study period, host-seeking mosquitoes were sampled by two different methods as follows:

#### ***BG- Sentinel trap (BGS)***

The BG-Sentinel® trap (BioGents, Regensburg, Germany) is a white, cylinder shaped trap made of plastic with a gauze cloth covering the top and a hollow black cylinder in the top centre of the trap (Figure 2a). The trap operates with a 12-volt battery that powers an internal fan that

produces inwards artificial air currents. In this study, each trap was baited with two BG-Lure® cartridges and a 1.4 litre cooler bottle filled with dry ice, as it is known that CO<sub>2</sub> increases the catch efficiency of BGS traps [76,77,80]. Mosquitoes are attracted towards the baited traps and then sucked through the hollow black cylinder into an internal mesh bag that can be easily removed for posterior processing.

### *Mosquito Electrocuting Trap (MET)*

The METs used here consisted of four 30 x 30 cm panels which were assembled into a box around the lower legs of a seated person (Figure 2b). Each panel was made up of stainless steel electrified wires set within a PVC frame. The wires were positioned 5mm apart, which is close enough so that mosquitoes could not pass through without making contact. Wires were vertically arranged in parallel, alternating positive with negative. When mosquitoes try to go through, contact is made and the voltage between wires kills them.

Mosquitoes attracted towards the volunteer were intercepted and killed on contact with these panels. The MET is powered by two 12-volt batteries connected in series to a power source giving a power output of approximately 6 watts (10mA, 600 volts). An eggcrate ceiling grid panel made of plastic was placed at the inside side of each frame to provide protection to volunteers from accidentally touching the electrified wires.

As an additional accessory to the MET, a retractable aluminium frame was built to cover the rest of the volunteer's body with untreated mosquito-proof netting. Thus volunteers were completely protected from mosquito bites during their participation in trapping. A plastic tarpaulin was erected over the MET station at a height of 2m top to protect users from direct rain

and sunlight. Each MET was also set up on top of a white plastic sheet to isolate it from the ground and make it easier to see and collect shocked mosquitoes that fell onto the ground after touching the MET.

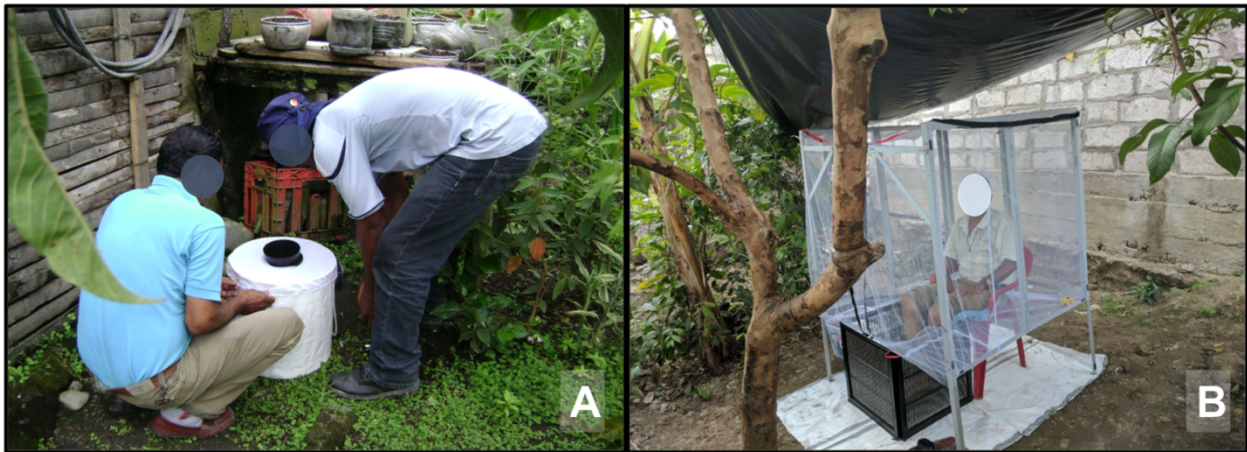

**Figure 2. Trapping methods used in this study.** (a) Typical setting up of a BGS trap. (b) Technician baiting for the MET.

### ***Experimental Design***

Every day of the study, four traps (two METs and two BGS traps) were set up in the peridomestic area of the four households (one trap per household) at the ground level under shade conditions. Traps were rotated among households each day, so that a different trapping method was used every consecutive day in each house. At the end of the study, this resulted in 6 days of trapping being conducted with each of the 2 methods at all houses.

MET collections were carried out by members of the research team, who were all adult men (30-50 years old). During each hour of the collection period, one member sat within the MET for 45 minutes, with the trap being turned off for the remaining 15 minutes to allow volunteers to take a break. Members of the study team took turns sitting in the trap so that different collectors lured every hour. During the 15-minute period when traps were turned off, mosquitoes were recovered from trap surfaces and the ground below using a pair of forceps, counted and placed in empty 15 ml falcon tubes; which were labelled with a unique code linked to the date, household ID, trap ID, hour period and collector ID. Tubes were stored in a cooler box of 45 L capacity filled with dry ice to kill, preserve and transport the specimens.

Each BGS was baited with two BG-Lure<sup>®</sup> cartridges on each day of sampling; with lures exchanged between the two BGS traps each day to minimize bias due to differential lure efficiency. BGS traps were further baited with carbon dioxide by adding one 1.2 L Coleman<sup>®</sup> polyethylene cooler bottle filled with dry ice. Dry ice containers were topped up every day. Like the MET, BGS sampling was conducted for 45 minutes of each sampling hour, with mosquito collection bags being checked and emptied during 15 minute break periods. Mosquitoes from BGS collection bags were emptied into pre-labelled plastic bags and transferred into a cooler box with dry ice to kill and preserve the mosquitoes.

Temperature and relative humidity data were collected every 10 minutes at each mosquito sampling point using TinyTag<sup>®</sup> Plus 2 TGP-4500 (Gemini Co., UK) data loggers. Data loggers at the BGS sampling stations were tied and hung inside each of the traps, and loggers at

MET sampling points were placed on top of the bottom border of the netting frame, next to the MET.

### ***Morphological Analysis***

Mosquitoes collected in the field were transported to the Medical Entomology and Tropical Medicine Laboratory of the San Francisco de Quito University (LEMMT-USFQ) in cooler boxes filled with dry ice. At LEMMT-USFQ, mosquitoes were morphologically identified using taxonomical keys [93–95], counted and sorted into different cryo-vials according to date, household, trap type, hour of collection, species, sex and physiological status of females (blood fed/gravid and non-blood fed). All female *Ae. aegypti* specimens were retained for subsequent molecular analysis to test for the presence of ZIKV, DENV and CHIKV. These *Ae. aegypti* samples were grouped into pools of a maximum of 5 individuals.

### ***Molecular Detection of Arboviruses***

All pools of female *Ae. aegypti* specimens were screened for the presence of CHIKV, DENV and ZIKV. Details on the RNA extraction, reverse-transcription and PCR procedures are given in the Supplementary File 1.

### ***Data Analysis***

Statistical analyses were performed in R 3.5.0 and R Studio 1.1.419. Generalized Linear Mixed Models (GLMM) were used to investigate variation in the abundance of host-seeking mosquitoes (per day and per hour) using package lme4 [96]. As mosquito abundance data was

overdispersed, all models were fitted with a negative binomial distribution. For all response variables of interest as described below, model selection was carried out through a process of backward stepwise elimination from a maximal model using Likelihood Ratio Tests (LRT) [97].

Statistical analysis was performed for *Ae. aegypti*, and *Culex quinquefasciatus* as the latter was the only other mosquito species found in high abundance in the study area. *Cx. quinquefasciatus* is a nuisance biting mosquito and also a known vector of West Nile Virus (WNV) [98].

The BGS traps functioned continuously across all days and sampling hours. However, the METs stopped running during some sampling hours; generally under conditions of very high humidity due to rainfall which resulted in dampness on the traps and some temporary short circuiting. When these malfunctions occurred, the damaged traps were turned off and repaired. This resulted in variation in the total number of hours sampled with each trapping method (MET: 229 hours, BGS: 270 hours). This variation in sampling effort was accounted for in the statistical analysis. Days having less than 9 hours were excluded from the analysis.

Four models were built to assess variation in the abundance of each mosquito species and sex combination respectively. For each of these four response variables, a maximal model was constructed that included the fixed explanatory variables of sampling effort (total number of hours of collection), trap type (MET or BGS), daily mean relative humidity (%RH), and daily mean temperature (°C). In addition, the interaction between daily mean temperature with



relative humidity was also included. Sampling day (1 through 12), household ID, trap ID and attractant ID (BG-Lure cartridge ID or MET volunteers ID) were included as random effects.

Mosquito biting activity was assessed through analysis of variation in the mean number of females (*Ae. aegypti* and *Cx. quinquefasciatus*) caught per hour. Here, each mosquito species was analysed separately. Each model included explanatory variables of trap type (MET or BGS), sampling hour, mean temperature (°C) per hour, mean relative humidity (%RH) per hour, and the interaction between hourly temperature and relative humidity. Sampling hour was defined as a continuous variable recoding the first hour of trapping (7-8 am) into 1, and increasing “hour” by one digit for each subsequent hour until 12 (17-18 hrs). Sampling hour was fit both as a linear and quadratic term; with the latter being used to test for peaks in biting time as have been previously reported for these mosquito species [99]. In addition, sampling day, trap ID, cluster ID, household ID (nested within cluster ID) and attractant ID (BG-Lure cartridge ID or MET volunteer ID) were fitted as random effects.

## RESULTS

### ***Mosquito Species and Abundance***

During the 12 day-experiment, a total of five mosquito species were collected by both trapping methods (Table 1). *Cx. quinquefasciatus* was the most abundant species (78.6%) followed by *Ae. aegypti* (15.63%), and small number of *Aedes angustivittatus* (2.69%), *Limatus durhami* (2.33%), and *Psorophora ferox* (0.15%). A small proportion of mosquitoes could not be

identified (0.51%, Table 1). Overall, more mosquitoes were collected with the BGS trap (60.77%) than with the MET (39.23%), but the numbers of *Ae. aegypti* were relatively similar (Table 1).



**Table 1. Abundance of mosquito species collected by MET and BGS traps.** Mosquito species abundances are split by sex and feeding status of females. The total sampling effort with the two METs was 229 hours, while for BGS traps was 270 hours over the 12 days of sampling.

| Species                       | Mosquito Electrocuting Trap<br>(MET) |         |       |             | BG-Sentinel (BGS) trap |         |       |             | Grand total |
|-------------------------------|--------------------------------------|---------|-------|-------------|------------------------|---------|-------|-------------|-------------|
|                               | ♂                                    | ♀ unfed | ♀ fed | Total       | ♂                      | ♀ unfed | ♀ fed | Total       |             |
| <i>Aedes aegypti</i>          | 100                                  | 99      | 19    | <b>218</b>  | 93                     | 91      | 27    | <b>211</b>  | <b>429</b>  |
| <i>Culex quinquefasciatus</i> | 496                                  | 238     | 44    | <b>778</b>  | 960                    | 345     | 77    | <b>1382</b> | <b>2160</b> |
| <i>Aedes angustivittatus</i>  | 4                                    | 38      | 6     | <b>48</b>   | 0                      | 24      | 2     | <b>26</b>   | <b>74</b>   |
| <i>Limatus durhami</i>        | 0                                    | 22      | 0     | <b>22</b>   | 0                      | 42      | 0     | <b>42</b>   | <b>64</b>   |
| <i>Psorophora ferox</i>       | 0                                    | 1       | 2     | <b>3</b>    | 0                      | 1       | 0     | <b>1</b>    | <b>4</b>    |
| <i>Unknown</i>                | 0                                    | 5       | 3     | <b>8</b>    | 0                      | 5       | 1     | <b>6</b>    | <b>14</b>   |
|                               | <b>Total MET:</b>                    |         |       | <b>1077</b> | <b>Total BGS trap:</b> |         |       | <b>1668</b> | <b>2745</b> |

In the BGS traps, some non-target insects including house flies, butterflies, crane flies, and many fruit flies were caught. No insect taxa other than mosquitoes shown in Table 1 were caught in MET collections.

The mean daily abundance of *Ae. aegypti* was approximately 2 females and 3 males for the BGS trap, and 4 females and 4 males for the MET, but no significant differences between trapping methods were found (Table 2, Figure 3a,b). The only significant predictor of daily abundance of females *Ae. aegypti* was temperature, which exhibited a negative association (Table 2, Figure 4a). Similarly, the mean daily abundance of *Cx. quinquefasciatus* females did not significantly differ between trapping methods (Table 2, Figure 3c,d), however confidence intervals (especially for males) around estimates were very large, indicating that larger sample sizes may be required to robustly test if there were differences between trap types. The number of female *Cx. quinquefasciatus* per day varied between 16 and 207; with variation being even more pronounced for males where a high of 576 was caught on one day. The daily abundance of female *Cx. quinquefasciatus* was negatively associated with daily temperature (Table 2, Figure 4b) and positively associated with the number of hours sampled in a day, while no significant differences were found in *Cx. quinquefasciatus* regarding any covariate (Table 2).

**Table 2. Summary table of statistical significance of terms tested from mosquito daily abundance.** Chi-square ( $X^2$ ), degrees of freedom (df) and  $p$ -values ( $p$ ) are provided for each sex within species. Bold values with an asterisk (\*) indicate significant terms. Fixed effects with a double S symbol (§) indicate the interaction term.

| Explanatory variables     | <i>Aedes aegypti</i> |    |      |           |    |              | <i>Culex quinquefasciatus</i> |    |      |           |    |                   |
|---------------------------|----------------------|----|------|-----------|----|--------------|-------------------------------|----|------|-----------|----|-------------------|
|                           | Males ♂              |    |      | Females ♀ |    |              | Males ♂                       |    |      | Females ♀ |    |                   |
|                           | $X^2$                | df | $p$  | $X^2$     | df | $p$          | $X^2$                         | df | $p$  | $X^2$     | df | $p$               |
| Sampling effort           | 3.38                 | 1  | 0.07 | 1.95      | 1  | 0.16         | 0.31                          | 1  | 0.58 | 15.91     | 1  | <b>&lt;0.001*</b> |
| Trap type                 | 2.18                 | 1  | 0.14 | 0.60      | 1  | 0.44         | 0.95                          | 1  | 0.33 | 1.5       | 1  | 0.22              |
| Temperature               | 0.22                 | 1  | 0.64 | 4.62      | 1  | <b>0.03*</b> | 0.06                          | 1  | 0.8  | 6.86      | 1  | <b>&lt;0.01*</b>  |
| Relative Humidity         | 1.14                 | 1  | 0.29 | 2.17      | 1  | 0.14         | 1.23                          | 1  | 0.27 | 1.1       | 1  | 0.29              |
| Temperature :: Humidity § | 2.22                 | 1  | 0.14 | 1.24      | 1  | 0.26         | 1.07                          | 1  | 0.3  | 1.27      | 1  | 0.26              |

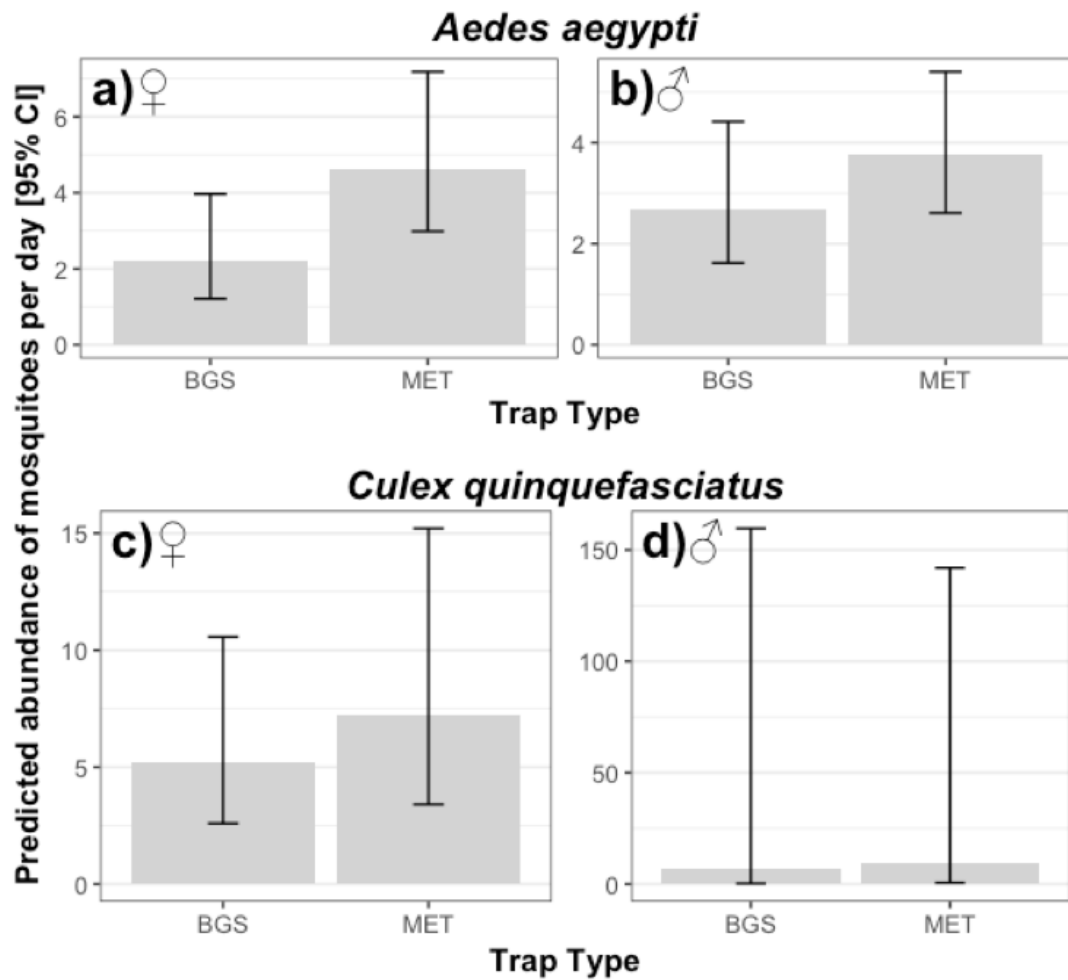

**Figure 3. Predicted mean daily abundance of mosquitoes caught with different trapping methods.** The upper panels show values for *Ae. aegypti* and the lower panels *Cx. quinquefasciatus*. Panels on the left show data for females (♀) and on the right for males (♂). Error bars indicate the Confidence Intervals (C.I.) at 95%.

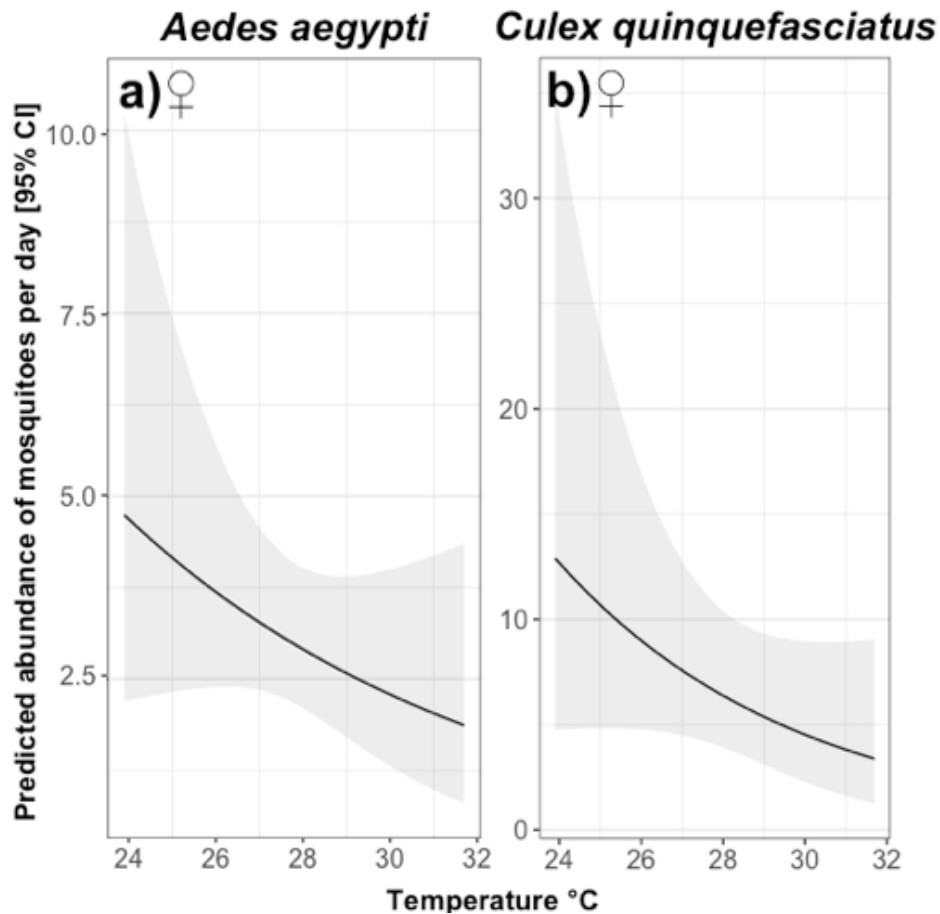

**Figure 4. Predicted relationship between mean temperature and number of female mosquitoes collected.** Panel **a)** shows *Ae. aegypti* and **b)** shows *Cx. quinquefasciatus* females. The black line indicates the mean predicted abundance and the shaded area the Confidence Intervals (C.I.) at 95%.

### **Mosquito Biting Activity**

Hourly mosquito catches recorded for BGS and METs were used to characterize the biting activity of female *Ae. aegypti* and *Cx. quinquefasciatus*. Variation in the hourly biting activity of female *Ae. aegypti* was best explained by a quadratic association between hourly mosquito abundance and time (Table 3), with activity being highest in the early mornings and late

afternoon, and little activity during the middle of the day (Figure 5a). After taking this hourly variation in biting rates into account, there was no additional impact of trapping method on the number of female *Ae. aegypti* collected per hour (Table 3, Figure 6). Variation in the hourly biting activity of *Ae. aegypti* was also significantly associated with an interaction between temperature and relative humidity (Table 3). This interaction arose because the number of *Ae. aegypti* caught per hour was negatively associated with temperature under conditions of low relative humidity; but the strength of this association was lower as humidity increased (Table 3, Figure 7), although temperature and humidity were strongly associated (Figure S1).

The biting activity of female *Cx. quinquefasciatus* also varied significantly across the sampling day. As with *Ae. aegypti*, this pattern was characterized as a quadratic relationship in which mosquito activity peaked during the early morning and late afternoon (Table 3, Figure 5b). Accounting for this activity pattern, there was no difference in the number of *Cx. quinquefasciatus* caught per hour in different trapping methods (Table 3, Figure 6b), and no association with temperature or humidity.

**Table 3. Summary table of statistical significance of terms tested for association with female mosquito hourly abundance.** *Chi-square ( $\chi^2$ ), degrees of freedom (df) and p-values are provided for females of each species. Bold values with an asterisk (\*) indicate significant terms. Fixed effects with a double S symbol (§) indicate the interaction term. “N/A” indicates “not applicable” values for which single term significance was not possible because of their involvement in significant higher order terms.*

| Explanatory variables     | <i>Aedes aegypti</i> - Females ♀ |     |                  | <i>Culex quinquefasciatus</i> - Females ♀ |     |                   |
|---------------------------|----------------------------------|-----|------------------|-------------------------------------------|-----|-------------------|
|                           | $\chi^2$                         | df  | <i>p</i>         | $\chi^2$                                  | df  | <i>p</i>          |
| Trap type                 | 0.60                             | 1   | 0.44             | 7e-04                                     | 1   | 0.98              |
| Time (linear)             | N/A                              | N/A | N/A              | N/A                                       | N/A | N/A               |
| Time (quadratic)          | 8.70                             | 1   | <b>&lt;0.01*</b> | 142.1                                     | 1   | <b>&lt;0.001*</b> |
| Temperature               | N/A                              | N/A | N/A              | 2.07                                      | 1   | 0.15              |
| Relative Humidity         | N/A                              | N/A | N/A              | 0.09                                      | 1   | 0.77              |
| Temperature :: Humidity § | 6.60                             | 1   | <b>0.01*</b>     | 0.09                                      | 1   | 0.76              |

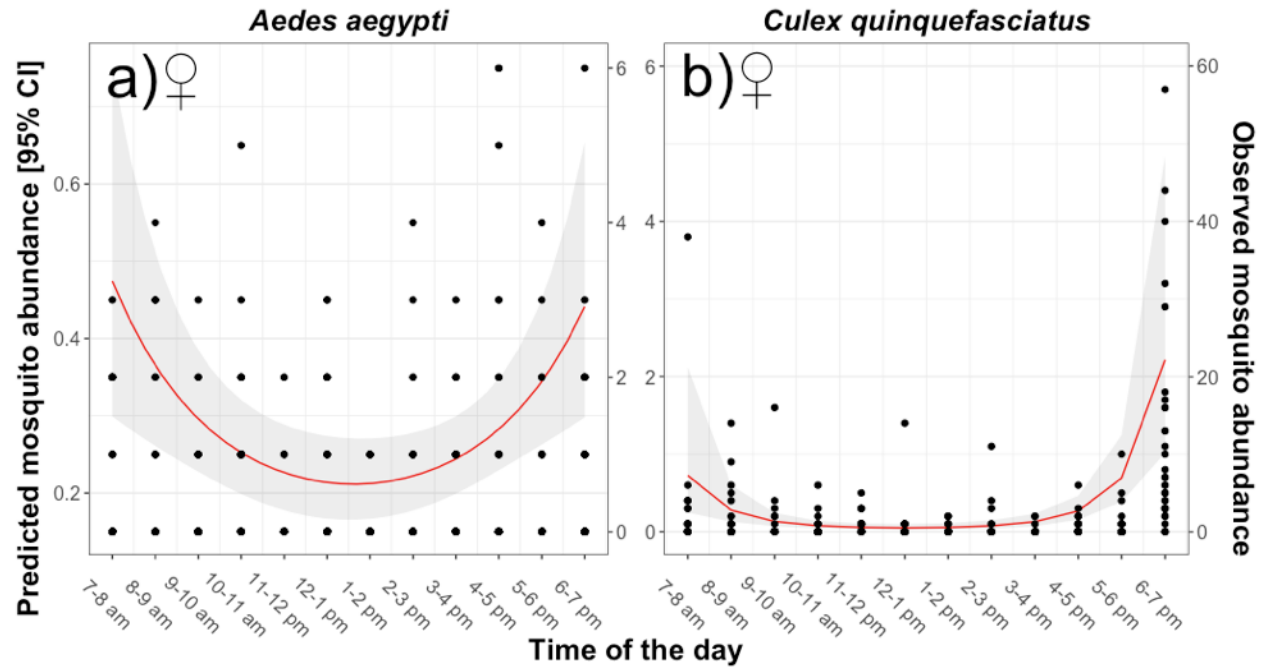

**Figure 5. Predicted abundance of biting mosquitoes between 7:00-19:00 hrs.** Panel a) indicates *Ae. aegypti* females and b) *Cx. quinquefasciatus* females. Dots represent the observed values which correspond to the right Y axis. The red line corresponds to the predicted mosquito abundance and the shaded area to the Confidence Intervals (C.I.) at 95%; both correspond to the left Y axis.



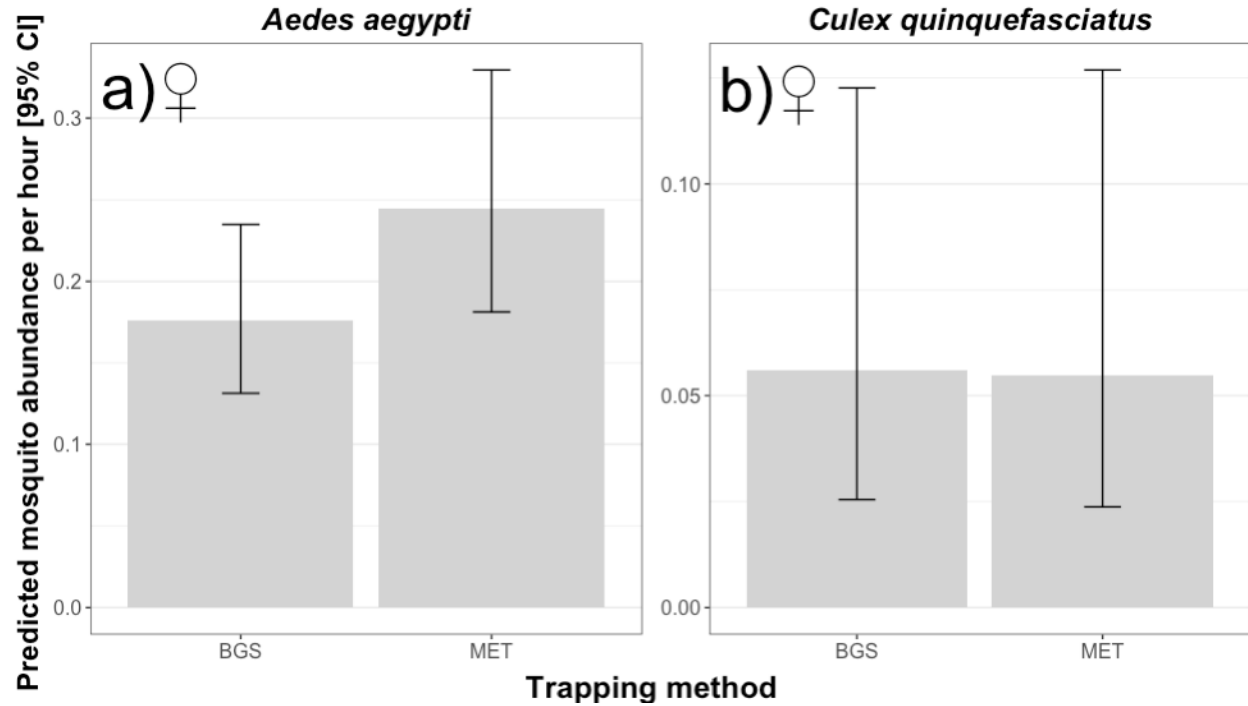

**Figure 6. Predicted hourly abundance of mosquitoes using different trapping methods.** Panel a) represents *Ae. aegypti* and b) *Cx. quinquefasciatus*. The error bars indicate the Confidence Intervals (C.I.) at 95%.

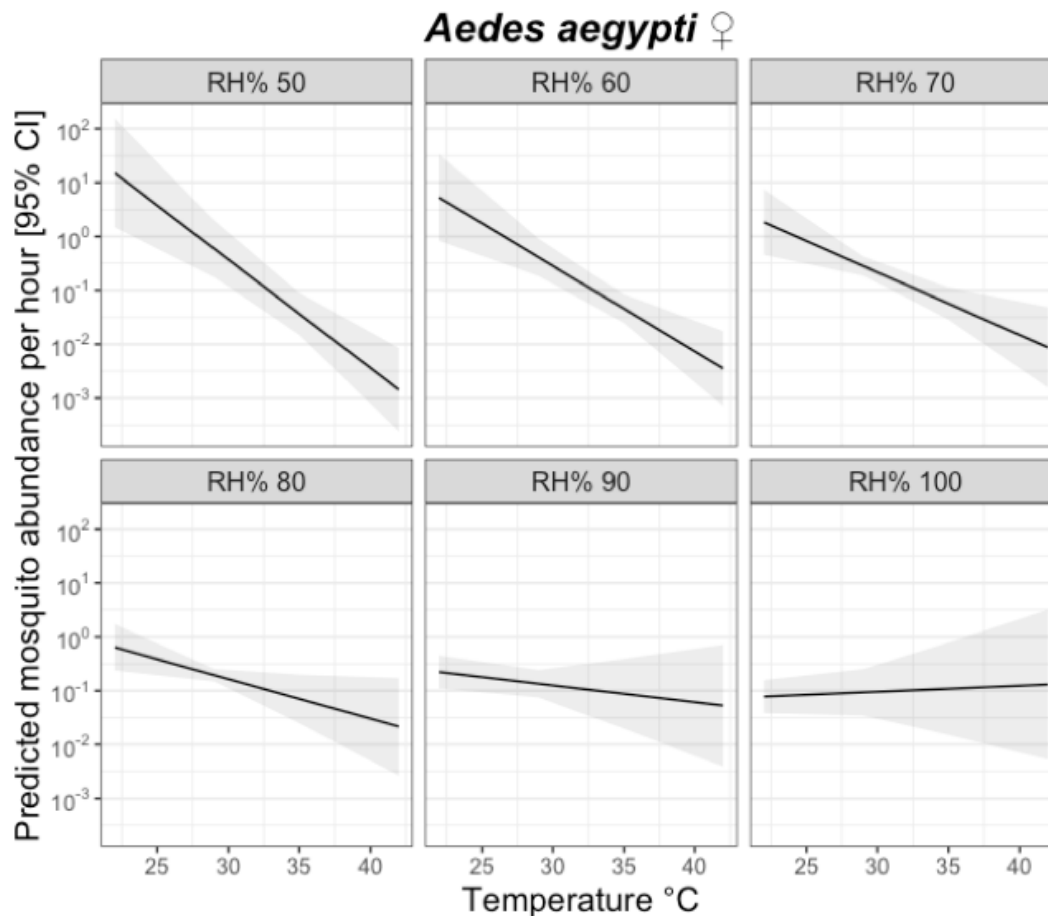

**Figure 7. Predicted relationship between the hourly abundance of *Ae. aegypti* females and mean temperature (°C) under different relative humidity (RH) conditions. The black line represents the predicted abundance of *Ae. aegypti* in that hour, with the shaded area representing the 95% Confidence Intervals (C.I.).**

#### **Molecular screen for ZIKV, DENV and CHIKV**

All positive controls worked in all of the PCRs carried out in this study. PCRs on S7 showed that RNA was successfully transcribed into cDNA in 121 mosquito pools out of 122 (Figure S2).

Weak bands coming from a few samples were observed on the gels from ZIKV, DENV 1-3 (PCR from universal primer) and DENV 4 (Figure S3, Figure S4 and Figure S5). Then, a second PCR was run on only those samples for reconfirmation. Weak bands were observed for a second time in some of the samples of ZIKV (Figure S6a). However, a PCR on the negative RT of those samples also showed weak bands (S6b) suggesting that they may be due to contamination with gDNA. Positivity of DENV 4 could not be confirmed either as no bands were observed on any of the samples (Figure S7). The second PCR of DENV 1-3 showed weak bands for the second time on a few samples (Figure S8), which were then tested on three separated PCRs using individual primers of DENV1, DENV2 and DENV3. However, positivity could not be confirmed either on any of the samples as no bands were observed (Figure S9). PCR results confirmed that no samples were infected with CHIKV either (Figure S10).

## DISCUSSION

Identifying an accurate method to predict the exposure of humans to infected mosquito vectors has been an enormous challenge for *Aedes*-borne pathogens [81,100]. Here, we present the MET as a potential alternative for safe measurement of *Aedes* landing rates on humans. When tested in dengue, chikungunya and Zika-endemic settings in Ecuador, the MET provided similar estimates of *Ae. aegypti* abundance and biting activity as the current gold standard BGS sentinel method. While the BGS uses artificial odour baits and carbon dioxide (CO<sub>2</sub>) to lure mosquitoes into a standardized trap; the MET directly estimates the number of *Aedes* host-seeking within the immediate vicinity of a real host. The standardization provided by the BGS

makes it easy and effective to use in widescale surveillance [82,84], although a limitation is that non-biogenic CO<sub>2</sub> sources are not always available [71,78]. However, the degree to which BGS collections accurately reflect *per capita* human biting rates is unclear. For example, BGS trapping efficiency may vary with the type and number and types of lures used, and volume of CO<sub>2</sub> released [60,76,101], making it difficult to infer how they translate to exposure experienced by one person in that environment. An advantage of the MET is that it is more directly analogous to the human landing catch in sampling mosquitoes in the process of host seeking on a person. This could also be seen on the total catches of the other mosquito species when compared to the total numbers trapped by the BGS. The MET could thus provide a useful supplementary surveillance method for estimation and validation of human biting rates and the associated entomological inoculation rate (EIR).

By facilitating a safe and more direct estimation of the EIR for *Aedes*-borne viruses, the MET could provide robust and precise entomological indicators of transmission intensity [85–87]. Such indicators are much needed to understand heterogeneity in transmission [3,4,55], and evaluate the efficiency of vector control interventions. However this relies on the assumption that the MET accurately reflects the true *Aedes* exposure of one person per unit of time. Estimates of human exposure to the malaria vector *An. gambiae s.l.* from the MET were similar to those of the human landing catch in some studies [87,102]; whereas in others mosquito abundance was underestimated by the MET compared to the HLC [86]. Here it was not possible to directly compare the MET to the HLC because of ethical restrictions in using the latter in an area of high arboviral transmission. However we speculate that one factor that could cause the

MET to underestimate *Aedes* vectors biting rates is the area of the body protected. Whereas African *Anopheles* vectors generally prefer feeding on the lower legs and feet [103–105]; it is not clear if *Aedes* prefer to bite on specific parts of the body [106,107]. As a next step in validating this approach, we recommend the MET to be directly compared to the HLC under controlled conditions with uninfected *Aedes* vectors (*e.g.* semi-field experiments).

Both the MET and BGS trap sampled a similar composition of mosquito species in the study period. However, estimates of the mean daily and hourly abundance of *Ae. aegypti* and *Cx. quinquefasciatus* were slightly but not statistically higher in MET than BGS collections. The relatively short period of this (12 sampling days) may have limited power to detect for minor-moderate differences between trapping methods. We thus conclude the MET is at least as good as the BGS gold standard for sampling host-seeking *Aedes* vectors in this setting, but also recommend further longer-term comparisons over a wider range of seasons, sites and participants to evaluate whether the MET outperforms the BGS. If we assume that MET is equivalent to HLC, these results are also consistent to those shown by Kröckel *et al.*, who also observed that HLC captured more mosquitoes, although not statistically different from the BGS [84].

Mosquito collections conducted here were also used to test for associations between *Aedes* host-seeking activity and microclimatic conditions. The impact of temperature and humidity on the life-history, physiology, behaviour and ecology of *Ae. aegypti* has been extensively investigated under laboratory conditions [108–116]. However, relatively little is

known about how microclimate impacts the diel host-seeking behaviour of wild *Aedes*. In general, the host-seeking activity *Ae. aegypti* and *Cx. quinquefasciatus* was higher on days when mean temperatures were lower (across range of 25°C to 30°C). Additionally, the hourly biting rates of *Aedes* were negatively associated with temperature but only under conditions of low humidity. As mean hourly temperatures were strongly negatively correlated with relative humidity (Figure S1), these results indicate that *Ae. aegypti* biting activity is highest during relatively cool and humid hours of the day. These microclimatic associations may account for the observed biting activity of *Ae. aegypti* and *Cx. quinquefasciatus*. A comprehensive review [99] of *Ae. aegypti* biting behaviour indicates that bimodal and trimodal activity patterns are often reported, with evidence of specific adaptations to other ecological features (*e.g.* artificial light availability) [99]. Such variability seems to be common and related to optimal humidity and temperature conditions available during such hours [117,118].

A key feature of any method for estimating EIR is its ability to estimate human biting rates and infection rates in mosquitoes. While the results here presented indicate that the MET could be used to estimate the human biting rates, the infection rates could not be measured as none of the *Aedes* mosquitoes collected with either trapping method were positive for arboviruses. Reported rates of arboviruses in *Aedes* vectors are generally very low (0.1% to 10%) even in high transmission areas (*e.g.* [119–126]). Thus failure to detect arboviruses within the relatively small sample size of vectors tested here (*e.g.* 207 individuals tested in 122 pools) is not unexpected.

Although promising, the MET has a number of limitations relative to the BGS for sampling host seeking *Aedes*. First, it requires human participants and the trap itself is heavier, which is more labour intensive than using BGS. Also, as the METs used here are still research prototypes produced on a bespoke basis without a licenced manufacturer, their production cost is currently more expensive than BGS traps (approximately £650 versus £170 per trap, respectively). In addition, some technical problems were experienced including a tendency to short circuit under conditions of high air humidity. These limitations are expected to be improved if manufactured at scale as manufacturing costs would fall and technical improvements should make the MET suitable for humid environments. The enormous advantage of the MET is therefore, its potential ability to estimate the EIR for arboviral infections.

## CONCLUSIONS

Here we evaluated the MET as a tool for estimating human biting rates of the arboviral vector *Ae. aegypti* in a high transmission setting in coastal Ecuador. The MET performed at least as good as the current BG-sentinel trap gold standard for estimating the mean abundance per hour of host-seeking *Aedes*, and provided a realistic representation of hourly activity patterns. We conclude MET is a promising tool for *Ae. aegypti* and other mosquito species surveillance, which could uniquely enable a relatively direct estimate of the arboviral entomological inoculation rate experienced by communities.

## DECLARATIONS

### ***Ethical approval and consent to participate***

Ethical approval for this research was granted by the MVLS College Ethics Committee of the University of Glasgow (Project No.: 200150175), and by the Ethics Committee of Research on Human Beings of the San Francisco de Quito University (2016-146M).

Prior to the study, the objectives of this research and risks and benefits for taking part in this were explained to participants in MET collections and their written informed consent was obtained. Oral informed consent was also obtained from the head of households where mosquito collections were performed. The purpose and objectives of the study was explained to householders before requesting permission for the study team to collect mosquitoes within their property.

### ***Agreements and permits for conducting research***

The Government of Ecuador, through the Ministry of Environment (MAE), granted the permits to carry out the present study under the Framework Agreement on Access to Genetic Resources No. MAE-DNB-CM-2016-0052. Transportation of samples from the study site in Quinindé (Rosa Zárate) to the LEMMT-USFQ in Quito was authorized by MAE through the document No. MAE-DPAE-2017-1163-O. Transfer of samples from the LEMMT-USFQ in Ecuador to the MRC-University of Glasgow CVR in the United Kingdom, was firstly established by a Material Transfer Agreement signed between Universidad San Francisco de Quito and the



University of Glasgow on the 1<sup>st</sup> of September of 2017. The exportation of biological samples from Ecuador was authorized by MAE under the document 076-17-EXP-IC-FAU-DNB/MA. Finally, a certification of no-need of importation permit to Scotland was issued through a letter from the Animal Health and Welfare Division of the Agriculture and Rural Economy Directorate of the Scottish Government on the 14<sup>th</sup> of September of 2017.

### ***Consent for publication***

Individuals pictured in the photographs of this manuscript granted their oral consent of the photographs in which they appear to be published.

### ***Availability of data and materials***

The dataset generated and analysed during this study is publicly available in the Open Science Framework repository at <https://osf.io/zwbs8>.

### ***Competing interests***

Authors declare there are no competing interests.

### ***Funding***

Funding for LDOL to develop this research as part of his PhD studies was provided by the Government of Ecuador through SENESCYT (AR2Q-9554) under the programme “Primera Convocatoria Abierta 2013”. Funding for this research work was provided by the Medical

Research Council from the United Kingdom under the grant number MC\_PC\_15081 (AK, HMF, LDOL, RL) and MC\_UU\_12014/8 (EP, AK).

### ***Authors contributions***

LDOL, HMF, RL and AK conceptualized the project. LDOL, MPB, ST and SS conducted the field work of mosquito collections under the supervision of RL and HMF. MPB and LDOL carried out the morphological analyses. LDOL and FA carried out the molecular analyses under permanent supervision of EP and AK. LDOL carried out the statistical analyses and wrote the manuscript under the guidance of HMF. AK, EP, HMF, MPB and RL edited the manuscript. All authors read and approved the final manuscript.

### ***Acknowledgements***

We thank all the residents from the local communities for granting access to their properties every day of the study. We also want to thank Jakub Czyzewski and the rest of the Bioelectronics Unit team of the University of Glasgow for building the Mosquito Electrocuting Traps (METs) and providing with their technical assistance before and during the experiments. We also want to specially thank Miguel Ortega-López and Teresa López-Cuesta for designing and building the retractable aluminium frames and the mosquito netting for the METs. We finally thank Ana Espinoza from Fibios Science Communication ([www.fibios.org](http://www.fibios.org)) for the design of the graphical abstract of this manuscript.

## REFERENCES

1. World Health Organization (WHO). Global burden of major vector-borne diseases, as of March 2017. *Glob. Vector Control Response 2017-2030* [Internet]. Geneva; 2017. p. 2. Available from: [http://www.who.int/vector-control/burden\\_vector-borne\\_diseases.pdf](http://www.who.int/vector-control/burden_vector-borne_diseases.pdf)
2. Mondini A, Chiaravalloti-Neto F. Spatial correlation of incidence of dengue with socioeconomic, demographic and environmental variables in a Brazilian city. *Sci. Total Environ.* 2008;393:241–8.
3. Reiner RC, Stoddard ST, Scott TW. Socially structured human movement shapes dengue transmission despite the diffusive effect of mosquito dispersal. *Epidemics* [Internet]. Elsevier B.V.; 2014;6:30–6. Available from: <http://dx.doi.org/10.1016/j.epidem.2013.12.003>
4. Stoddard ST, Kochel TJ, Halsey ES, Scott TW, Kitron U, Astete H, et al. House-to-house human movement drives dengue virus transmission. *Proc. Natl. Acad. Sci.* 2013;110:994–9.
5. Wesolowski A, Qureshi T, Boni MF, Sundsøy PR, Johansson MA, Rasheed SB, et al. Impact of human mobility on the emergence of dengue epidemics in Pakistan. *Proc. Natl. Acad. Sci.* 2015;112:11887–92.
6. Sutherland LJ, Cash AA, Huang YJS, Sang RC, Malhotra I, Moormann AM, et al. Serologic evidence of arboviral infections among humans in Kenya. *Am. J. Trop. Med. Hyg.* 2011;85:158–61.

7. Carver S, Bestall A, Jardine A, Ostfeld RS. Influence of Hosts on the Ecology of Arboviral Transmission: Potential Mechanisms Influencing Dengue, Murray Valley Encephalitis, and Ross River Virus in Australia. *Vector-Borne Zoonotic Dis.* 2008;9:51–64.
8. Walker KR, Williamson D, Carrière Y, Reyes-Castro PA, Haenchen S, Hayden MH, et al. Socioeconomic and human behavioral factors associated with *Aedes aegypti* (Diptera: Culicidae) immature habitat in Tucson, AZ. *J. Med. Entomol.* 2018;55:955–63.
9. Setbon M, Raude J. Population response to the risk of vector-borne diseases: lessons learned from socio-behavioural research during large-scale outbreaks. *Emerg. Health Threats J.* 2012;2:7083.
10. Joshi V, Sharma RC, Sharma Y, Adha S, Sharma K, Singh H, et al. Importance of Socioeconomic Status and Tree Holes in Distribution of *Aedes* Mosquitoes (Diptera: Culicidae) in Jodhpur, Rajasthan, India. *J. Med. Entomol.* 2006;43:330–6.
11. Stewart Ibarra AM, Ryan SJ, Beltrán E, Mejía R, Silva M, Muñoz Á. Dengue vector dynamics (*Aedes aegypti*) influenced by climate and social factors in Ecuador: Implications for targeted control. *PLoS One.* 2013;8:639–47.
12. Kraemer MUG, Sinka ME, Duda KA, Mylne AQN, Shearer FM, Barker CM, et al. The global distribution of the arbovirus vectors *Aedes aegypti* and *Ae. Albopictus*. *Elife.* 2015;4:1–18.
13. Kraemer M, Reiner R, Brady O, Messina J, Gilbert M, Pigott D, et al. Past and future spread of the arbovirus vectors *Aedes aegypti* and *Aedes albopictus*. *Nat. Microbiol.* [Internet].

Springer US; 2019;In Press. Available from: <http://dx.doi.org/10.1038/s41564-019-0376-y>

14. Kamal M, Kenawy MA, Rady MH, Khaled AS, Samy AM. Mapping the global potential distributions of two arboviral vectors *Aedes aegypti* and *Ae. albopictus* under changing climate. PLoS One. 2018;13:1–21.
15. Conway MJ, Colpitts TM, Fikrig E. Role of the Vector in Arbovirus Transmission. Annu. Rev. Virol. 2014;1:71–88.
16. Dickens BL, Sun H, Jit M, Cook AR, Carrasco LR. Determining environmental and anthropogenic factors which explain the global distribution of *Aedes aegypti* and *Ae. albopictus*. BMJ Glob. Heal. 2018;3:e000801.
17. Weetman D, Kamgang B, Badolo A, Moyes CL, Shearer FM, Coulibaly M, et al. *Aedes* mosquitoes and *Aedes*-borne arboviruses in Africa: Current and future threats. Int. J. Environ. Res. Public Health. 2018;15:1–20.
18. Alto B, Lounibos LP, Higgs S, Juliano S. Larval competition differentially affects arbovirus infection in *Aedes* mosquitoes. Ecology. 2005;86:3279–88.
19. Marini G, Guzzetta G, Baldacchino F, Arnoldi D, Montarsi F, Capelli G, et al. The effect of interspecific competition on the temporal dynamics of *Aedes albopictus* and *Culex pipiens*. Parasites and Vectors. Parasites & Vectors; 2017;10:1–9.
20. Eder M, Cortes F, Teixeira de Siqueira Filha N, Araújo de França GV, Degroote S, Braga C, et al. Scoping review on vector-borne diseases in urban areas: transmission dynamics, vectorial

- capacity and co-infection. *Infect. Dis. Poverty. Infectious Diseases of Poverty*; 2018;7:1–24.
21. Kuno G, Chang GJ. Biological transmission of arboviruses: reexamination of and new insights into components, mechanisms, and unique traits as well as their evolutionary trends. *Clin. Microbiol. Rev.* 2005;18:608–37.
22. Barrett ADT. Current status of Zika vaccine development: Zika vaccines advance into clinical evaluation. *npj Vaccines* [Internet]. Springer US; 2018;3:1–4. Available from: <http://dx.doi.org/10.1038/s41541-018-0061-9>
23. Abbink P, Stephenson KE, Barouch DH. Zika virus vaccines. *Nat. Rev. Microbiol.* [Internet]. Springer US; 2018;16:594–600. Available from: <http://dx.doi.org/10.1038/s41579-018-0039-7>
24. Powers AM. Vaccine and therapeutic options to control chikungunya virus. *Clin. Microbiol. Rev.* 2018;31:1–29.
25. Rezza G, Weaver SC. Chikungunya as a paradigm for emerging viral diseases: Evaluating disease impact and hurdles to vaccine development. *PLoS Negl. Trop. Dis.* 2019;13:e0006919.
26. World Health Organization. Dengue vaccine: WHO position paper, September 2018 – Recommendations. *Vaccine.* 2018;9–10.
27. Centers for Disease Control and Prevention - Department of Health and Human Services  
Public Health Service Centers for Disease Control and Prevention National Center. West Nile

Virus in the United States: Guidelines for Surveillance, Prevention, and Control. 2013;

Available from: <https://www.cdc.gov/westnile/resources/pdfs/wnvGuidelines.pdf>

28. Yakob L, Walker T. Zika virus outbreak in the Americas: The need for novel mosquito control methods. *Lancet Glob. Heal.* [Internet]. Yakob et al. Open access article distributed under the terms of CC BY; 2016;4:e148–9. Available from: [http://dx.doi.org/10.1016/S2214-109X\(16\)00048-6](http://dx.doi.org/10.1016/S2214-109X(16)00048-6)
29. World Health Organization. Dengue: guidelines for diagnosis, treatment, prevention, and control. *Spec. Program. Res. Train. Trop. Dis.* [Internet]. 2009;x, 147. Available from: [http://whqlibdoc.who.int/publications/2009/9789241547871\\_eng.pdf](http://whqlibdoc.who.int/publications/2009/9789241547871_eng.pdf)
30. Gubler DJ. Emerging vector-borne flavivirus diseases: are vaccines the solution? *Expert Rev. Vaccines* [Internet]. 2011;10:563–5. Available from: <http://www.ncbi.nlm.nih.gov/pubmed/21604976>
31. Tusting LS, Bousema T, Smith DL, Drakeley C. Measuring changes in *Plasmodium falciparum* transmission. Precision, accuracy and costs of metrics [Internet]. 1st ed. *Adv. Parasitol.* Elsevier Ltd.; 2014. Available from: <http://dx.doi.org/10.1016/B978-0-12-800099-1.00003-X>
32. MacDonald G. *The epidemiology and control of malaria.* London: Oxford University Press; 1957.
33. Smith DL, Barker CM, Scott TW, Battle KE, McKenzie FE, Hay SI, Ross, Macdonald, and a Theory for the Dynamics and Control of Mosquito-Transmitted Pathogens. *PLoS Pathog.*

2012;8:1–13.

34. Beier JC, Killeen GF, Githure JI. Short report: entomologic inoculation rates and *Plasmodium falciparum* malaria prevalence in Africa. *Am. J. Trop. Med. Hyg.* 2017;61:109–13.
35. Beier JC. Vector Incrimination and Entomological Inoculation Rates. In: Doolan DL, editor. *Malar. Methods Protoc.* [Internet]. 72nd ed. Humana Press Inc.; 2002. p. 3–11. Available from: <https://link.springer.com/protocol/10.1385/1-59259-271-6:01>
36. Kelly-Hope LA, McKenzie FE. The multiplicity of malaria transmission: A review of entomological inoculation rate measurements and methods across sub-Saharan Africa. *Malar. J.* 2009;8:1–16.
37. Smith DL, Ellis Mckenzie F. Statics and dynamics of malaria infection in *Anopheles* mosquitoes. *Malar J* [Internet]. 2004;3:13. Available from: <file:///Users/granthughes/Documents/Papers/2004/Smith/Malar J 2004 Smith.pdf> LB - p14468
38. World Health Organization (WHO). *Malaria entomology and Vector Control (Guide for Participants)*. Train. Modul. *Malar. Control.* 2015.
39. World Health Organization. *Manual on practical entomology in malaria. Part II. Methods and techniques.* Geneva: WHO Division of Malaria and other Parasitic Diseases; 1975.
40. Service M. A critical review of procedures for sampling populations of adult mosquitoes. *Bull. Entomol. Res.* 1977;67:343–82.



41. Ndebele P, Musesengwa R. View point: Ethical dilemmas in malaria vector research in Africa: Making the difficult choice between mosquito, science and humans. *Malawi Med. J.* 2012;24:65–8.
42. Gimnig JE, Walker ED, Otieno P, Kosgei J, Olang G, Ombok M, et al. Incidence of malaria among mosquito collectors conducting human landing catches in Western Kenya. *Am. J. Trop. Med. Hyg.* 2013;88:301–8.
43. World Health Organization (WHO). Ethical issues associated with vector-borne diseases. Geneva; 2017.
44. Achee N, Youngblood L, Bangs M, Lavery J, James S. Considerations for the Use of Human Participants in Vector Biology Research: A Tool for Investigators and Regulators. *Vector-Borne Zoonotic Dis.* 2015;15:89–102.
45. Focks D. A review of entomological sampling methods and indicators for dengue vectors. 2003.
46. Barrera R, Amador M, Clark GG. Use of the Pupal Survey Technique for Measuring *Aedes aegypti* (Diptera: Culicidae) Productivity in Puerto Rico. *Am. J. Trop. Med. Hyg.* 2006;74:290–302.
47. Burke RL, Barrera R, Kluchinsky T, Lewis M, Clabom DM. Examination of a Miniaturized Funnel Trap for *Aedes aegypti* (Diptera: Culicidae) Larval Sampling. *J. Med. Entomol.* 2010;47:1231–4.

48. Lin C-H, Schioler KL, Ekstrom KT, Konradsen F. Location, seasonal, and functional characteristics of water holding containers with juvenile and pupal *Aedes aegypti* in Southern Taiwan: A cross-sectional study using hurdle model analyses. PLoS Negl. Trop. Dis. [Internet]. 2018;12:1–19. Available from: <http://ovidsp.ovid.com/ovidweb.cgi?T=JS&PAGE=reference&D=emexb&NEWS=N&AN=624682062>
49. Seng CM, Setha T, Nealon J, Socheat D. Pupal sampling for *Aedes aegypti* (L.) surveillance and potential stratification of dengue high-risk areas in Cambodia. Trop. Med. Int. Heal. 2009;14:1233–40.
50. Bangs MJ, Tan R, Listiyaningsih E, Kay BH, Porter KR. Detection of Dengue Viral RNA in *Aedes aegypti* (Diptera: Culicidae) Exposed to Sticky Lures Using Reverse-Transcriptase Polymerase Chain Reaction. J. Med. Entomol. 2009;38:720–4.
51. Roslan MA, Ngui R, Vythilingam I, Sulaiman WYW. Evaluation of sticky traps for adult *Aedes mosquitoes* in Malaysia: a potential monitoring and surveillance tool for the efficacy of control strategies. J. Vector Ecol. 2017;42:298–307.
52. Clark GG, Seda H, Gubler DJ. Use of the “CDC backpack aspirator” for surveillance of *Aedes*. J. Am. Mosq. Control Assoc. 1994;10:119–24.
53. Vazquez-Prokopec GM, Galvin WA, Kelly R, Kitron U. A New, Cost-Effective, Battery-Powered Aspirator for Adult Mosquito Collections. J. Med. Entomol. 2009;46:1256–9.

54. Cromwell EA, Stoddard ST, Barker CM, Van Rie A, Messer WB, Meshnick SR, et al. The relationship between entomological indicators of *Aedes aegypti* abundance and dengue virus infection. *PLoS Negl. Trop. Dis.* 2017;11:1–22.
55. Bowman LR, Runge-Ranzinger S, McCall PJ. Assessing the Relationship between Vector Indices and Dengue Transmission: A Systematic Review of the Evidence. *PLoS Negl. Trop. Dis.* 2014;8:1–11.
56. Fay RW. A trap based on visual responses of adult mosquitoes. *Mosq. News.* 1968;28:1–7.
57. Fay R, Prince W. A modified visual trap for *Aedes aegypti*. *Mosq. News.* 1970;30:20–3.
58. Wilton DP, Kloter KO. Preliminary Evaluation of a Black Cylinder Suction Trap for *Aedes aegypti* and *Culex quinquefasciatus* (Diptera: Culicidae). *J. Med. Entomol.* 1985;22:113–4.
59. Freier JE, Francy DB. A duplex cone trap for the collection of adult *Aedes albopictus*. *J. Am. Mosq. Control Assoc.* 1991;7:73–9.
60. Williams CR, Bergbauer R, Geier M, Kline DL, Bernier UR, Russell RC, et al. Laboratory and field assessment of some kairomone blends for host-seeking *Aedes aegypti*. *J. Am. Mosq. Control Assoc.* 2006;22:641–7.
61. Scott-Fiorenzano JM, Fulcher AP, Seeger KE, Allan SA, Kline DL, Koehler PG, et al. Evaluations of dual attractant toxic sugar baits for surveillance and control of *Aedes aegypti* and *Aedes albopictus* in Florida. *Parasites and Vectors* [Internet]. *Parasites & Vectors*; 2017;10:1–9. Available from: <http://dx.doi.org/10.1186/s13071-016-1937-z>

62. da Silva Paixão K, Pereira IDC, Lucilene A, Ferreira Vilela E, Eiras ÁE. Volatile semiochemical-conditioned attraction of the male yellow fever mosquito, *Aedes aegypti*, to human hosts. *J. Vector Ecol.* 2015;40:1–6.
63. Ong S-Q, Jaal Z. Assessment of potential kairomones and combination with the presence of insecticides in attracting *Aedes aegypti* (L.). *Serangga.* 2017;22:179–92.
64. Andrianjafy TM, Ravaomanarivo LH, Ramanandraibe VV, Rakotondramanga MF, Mavingui P, Lemaire M. Synthesis, Bioassays and Field Evaluation of Hydroxycoumarins and their Alkyl Derivatives as Repellents or Kairomones for *Aedes albopictus* Skuse (Diptera: Culicidae). *J. Chem. Ecol. Journal of Chemical Ecology;* 2018;44:299–311.
65. Xu P, Choo YM, Pelletier J, Sujimoto FR, Hughes DT, Zhu F, et al. Silent, generic and plant kairomone sensitive odorant receptors from the Southern house mosquito. *J. Insect Physiol.* [Internet]. Elsevier Ltd; 2013;59:961–6. Available from: <http://dx.doi.org/10.1016/j.jinsphys.2013.07.004>
66. Barbosa RMR, Furtado A, Regis L, Leal WS. Evaluation of an oviposition-stimulating kairomone for the yellow fever mosquito, *Aedes aegypti*, in Recife, Brazil. *J. Vector Ecol.* 2010;35:204–7.
67. Xie L, Yang W, Liu H, Liu T, Xie Y, Lin F, et al. Enhancing attraction of the vector mosquito *Aedes albopictus* by using a novel synthetic odorant blend. *Parasit. Vectors* [Internet]. BioMed Central; 2019;12:382. Available from: <https://parasitesandvectors.biomedcentral.com/articles/10.1186/s13071-019-3646-x>

68. Liu H, Dixon D, Bibbs CS, Xue R De. Autocidal Gravid Ovitrap Incorporation with Attractants for Control of Gravid and Host-Seeking *Aedes aegypti* (Diptera: Culicidae). J. Med. Entomol. 2019;56:576–8.
69. Akaratovic KI, Kiser JP, Gordon S, Abadam CF. Evaluation of the Trapping Performance of Four Biogents AG Traps and Two Lures for the Surveillance of *Aedes albopictus* and Other Host-Seeking Mosquitoes. J. Am. Mosq. Control Assoc. 2017;33:108–15.
70. Arimoto H, Harwood JF, Nunn PJ, Richardson AG, Gordon S, Obenauer PJ. Comparison of Trapping Performance Between the Original BG-Sentinel® Trap and BG-Sentinel 2® Trap. J. Am. Mosq. Control Assoc. 2015;31:384–7.
71. Sukumaran D. A review on use of attractants and traps for host seeking *Aedes aegypti* mosquitoes. Indian J. Nat. Prod. Resour. 2016;7:207–14.
72. Sallam MF, Pereira RM, Batich C, Koehler P. Factors affecting short-range host-seeking for the yellow fever mosquito (Diptera: Culicidae). J. Med. Entomol. 2019;56:609–16.
73. Zahouli JBZ, Koudou BG, Müller P, Malone D, Tano Y, Utzinger J. Effect of land-use changes on the abundance, distribution, and host-seeking behavior of *Aedes arbovirus* vectors in oil palm-dominated landscapes, southeastern Côte d'Ivoire. PLoS One. 2017;12:1–26.
74. Gao Q, Wang F, Lv X, Cao H, Zhou J, Su F, et al. Comparison of the human-baited double net trap with the human landing catch for *Aedes albopictus* monitoring in Shanghai, China. Parasites and Vectors. Parasites & Vectors; 2018;11:1–12.

75. Krajacich B, Slade J, Mulligan R, La Brecque B, Kobylinski K, Gray M, et al. Design and Testing of a Novel, Protective Human-Baited Tent Trap for the Collection of Anthropophilic Disease Vectors. *J. Med. Entomol.* 2014;51:253–63.
76. Wilke ABB, Carvajal A, Medina J, Anderson M, Nieves VJ, Ramirez M, et al. Assessment of the effectiveness of BG-Sentinel traps baited with CO<sub>2</sub> and BG-Lure for the surveillance of vector mosquitoes in Miami-Dade County, Florida. *PLoS One.* 2019;14:1–15.
77. Irish SR, Chandre F, N’Guessan R. Comparison of Octenol- And BG Lure<sup>®</sup>-Baited Biogents Sentinel Traps and an Encephalitis Virus Surveillance Trap in Portland, OR. *J. Am. Mosq. Control Assoc.* 2008;24:393–7.
78. Harwood JF, Arimoto H, Nunn P, Richardson AG, Obenauer PJ. Assessing Carbon Dioxide and Synthetic Lure-Baited Traps for Dengue and Chikungunya Vector Surveillance. *J. Am. Mosq. Control Assoc.* 2015;31:242–7.
79. Maciel-de-Freitas R, Eiras ÁE, Lourenço-de-Oliveira R. Field evaluation of effectiveness of the BG-Sentinel, a new trap for capturing adult *Aedes aegypti* (Diptera: Culicidae). *Mem. Inst. Oswaldo Cruz.* 2006;101:321–5.
80. Meeraus WH, Armistead JS, Arias JR. Field Comparison of Novel and Gold Standard Traps for Collecting *Aedes albopictus* in Northern Virginia. *J. Am. Mosq. Control Assoc.* 2008;24:244–8.
81. Reiter P. Surveillance and Control of Urban Dengue Vectors. In: Gubler DJ, Ooi EE, Vasudevan S, Farrar J, editors. *Dengue and Dengue Hemorrhagic Fever*. 2nd ed. Oxfordshire:

CAB International; 2014. p. 481–518.

82. World Health Organization (WHO). Efficacy-testing of traps for control of *Aedes* spp. mosquito vectors [Internet]. 2018. Available from:  
<http://eprints.gla.ac.uk/173660/1/173660.pdf>
83. Centers for Disease Control and Prevention. Surveillance and Control of *Aedes aegypti* and *Aedes albopictus* in the United States [Internet]. 2017. Available from:  
<http://www.cdc.gov/chikungunya/resources/vector-control.html>
84. Kröckel U, Rose A, Eiras ÁE, Geier M. New Tools for Surveillance of Adult Yellow Fever Mosquitoes: Comparison of Trap Catches With Human Landing Rates in an Urban Environment. *J. Am. Mosq. Control Assoc.* [Internet]. 2006;22:229–38. Available from:  
<http://www.bioone.org/doi/abs/10.2987/8756-971X%282006%2922%5B229%3ANTFSOA%5D2.0.CO%3B2>
85. Govella NJ, Maliti DF, Mlwale AT, Masallu JP, Mirzai N, Johnson PCD, et al. An improved mosquito electrocuting trap that safely reproduces epidemiologically relevant metrics of mosquito human-feeding behaviours as determined by human landing catch. *Malar. J.* [Internet]. *BioMed Central*; 2016;15:465. Available from:  
<http://malariajournal.biomedcentral.com/articles/10.1186/s12936-016-1513-1>
86. Maliti D V, Govella NJ, Killeen GF, Mirzai N, Johnson PCD, Kreppel K, et al. Development and evaluation of mosquito-electrocuting traps as alternatives to the human landing catch technique for sampling host-seeking malaria vectors. *Malar. J.* [Internet]. *BioMed Central*;

2015;14:502. Available from:

<http://www.pubmedcentral.nih.gov/articlerender.fcgi?artid=4681165&tool=pmcentrez&rendertype=abstract>

87. Meza FC, Kreppel KS, Maliti DF, Mlwale AT, Mirzai N, Killeen GF, et al. Mosquito electrocuting traps for directly measuring biting rates and host-preferences of *Anopheles arabiensis* and *Anopheles funestus* outdoors. *Malar. J.* [Internet]. BioMed Central; 2019;18:1–11. Available from: <https://doi.org/10.1186/s12936-019-2726-x>
88. Dirección Nacional de Vigilancia Epidemiológica; Ministerio de Salud. Gaceta 2-2016. Virus chikungunya. 2016;
89. Dirección Nacional de Vigilancia Epidemiológica; Ministerio de Salud. Gaceta 52-2016. Virus Zika. 2016.
90. Dirección Nacional de Vigilancia Epidemiológica; Ministerio de Salud. Gaceta 52-2017. Enfermedades vectoriales. 2017; Available from: <http://www.salud.gob.ec/wp-content/uploads/2017/07/Gaceta-Vectorial-SE52.pdf>
91. Dirección Nacional de Vigilancia Epidemiológica, Ministerio de Salud Publica - Ecuador. Gaceta 52-2016. Virus Dengue. 2016;
92. User:Rei-artur. A large blank world map with oceans marked in blue.svg. Wikimedia Commons. Licence: CC BY-SA 3.0; 2006.
93. Lane J. Neotropical Culicidae, Vol. 1. Sao Paulo, Brazil: University of Sao Paulo; 1953.



94. Lane J. Neotropical Culicidae, Vol. 2. University of Sao Paulo; 1953.
95. Consoli R, Ricardo Lourenco de O. Principais mosquitos de importância sanitária no Brasil. Rio de Janeiro: SciELO-Editora FIOCRUZ; 1994.
96. Bates D, Mächler M, Bolker B, Walker S. Fitting Linear Mixed-Effects Models using lme4. J. Stat. Softw. [Internet]. 2015;67:1–48. Available from: <http://arxiv.org/abs/1406.5823>
97. Chambers JM, Hastie TJ. Statistical Models in S. Wadsworth & Brooks/Cole; 1992.
98. Farajollahi A, Fonseca DM, Kramer LD, Marm Kilpatrick A. “Bird biting” mosquitoes and human disease: A review of the role of *Culex pipiens* complex mosquitoes in epidemiology. Infect. Genet. Evol. [Internet]. Elsevier B.V.; 2011;11:1577–85. Available from: <http://dx.doi.org/10.1016/j.meegid.2011.08.013>
99. Lima-Camara TN. Activity Patterns of *Aedes aegypti* and *Aedes albopictus* (Diptera: Culicidae) Under Natural and Artificial Conditions. Oecologia Aust. 2010;14:737–44.
100. Sivagnaname N, Gunasekaran K. Need for an efficient adult trap for the surveillance of dengue vectors. Indian J. Med. Res. 2012;136:739–49.
101. Roiz D, Duperier S, Roussel M, Boussès P, Fontenille D, Simard F, et al. Trapping the tiger: Efficacy of the novel BG-sentinel 2 with several attractants and carbon dioxide for collecting *Aedes albopictus* (Diptera: Culicidae) in southern France. J. Med. Entomol. 2016;53:460–5.
102. Govella NJ, Chaki PP, Mpangile JM, Killeen GF. Monitoring mosquitoes in urban Dar es

- Salaam: Evaluation of resting boxes, window exit traps, CDC light traps, Ifakara tent traps and human landing catches. *Parasites and Vectors*. 2011;4:1–12.
103. Dekker T, Takken W, Knols B, Bouman E, Van Der Laak S, de Bever A, et al. Selection of biting sites on a human host by *Anopheles gambiae* sensu stricto, *An. arabiensis* and *An. quadriannulatus*. *Entomol. Exp. Appl.* 1998;87:295–300.
104. De Jong R, Knols BGJ. Selection of biting sites on man by two malaria mosquito species. *Experientia*. 1995;51:80–4.
105. Braack L, Hunt R, Koekemoer LL, Gericke A, Munhenga G, Haddow AD, et al. Biting behaviour of African malaria vectors:1. Where do the main vector species bite on the human body? *Parasites and Vectors*. 2015;8:1–10.
106. Derek Charlwood J, Tomás EVE, Kelly-Hope L, Briët OJT. Evidence of an “invitation” effect in feeding sylvatic *Stegomyia albopicta* from Cambodia. *Parasites and Vectors*. 2014;7:1–9.
107. Shirai Y, Funada H, Kamimura K, Seki T, Morohashi M. Landing sites on the human body preferred by *Aedes albopictus*. *J. Am. Mosq. Control Assoc.* 2002;18:97–9.
108. Zapletal J, Erraguntla M, Adelman ZN, Myles KM, Lawley MA. Impacts of diurnal temperature and larval density on aquatic development of *Aedes aegypti*. *PLoS One*. 2018;13:1–16.
109. Scott TW, Morrison AC, Lorenz LH, Clark GG, Strickman D, Kittayapong P, et al. Longitudinal Studies of *Aedes aegypti* (Diptera: Culicidae) in Thailand and Puerto Rico: Population

- Dynamics. J. Med. Entomol. 2000;37:77–88.
110. Rivas GBS, Teles-de-Freitas R, Pavan MG, Lima JBP, Peixoto AA, Bruno RV. Effects of Light and Temperature on Daily Activity and Clock Gene Expression in Two Mosquito Disease Vectors. J. Biol. Rhythms. 2018;33:272–88.
111. Rueda L, Patel K, Axtell R, Stinner R. Temperature-Dependent Development and Survival Rates of *Culex quinquefasciatus* and *Aedes aegypti* (Diptera: Culicidae). J. Med. Entomol. 1990;27:892–8.
112. Richardson K, Hoffmann AA, Johnson P, Ritchie S, Kearney MR. Thermal Sensitivity of *Aedes aegypti* From Australia: Empirical Data and Prediction of Effects on Distribution. J. Med. Entomol. 2011;48:914–23.
113. Mohammed A, Chadee DD. Effects of different temperature regimens on the development of *Aedes aegypti* (L.) (Diptera: Culicidae) mosquitoes. Acta Trop. [Internet]. Elsevier B.V.; 2011;119:38–43. Available from: <http://dx.doi.org/10.1016/j.actatropica.2011.04.004>
114. Beserra EB, Fernandes CRM, Silva SA de O, Silva LA da, Santos JW dos. Efeitos da temperatura no ciclo de vida, exigências térmicas e estimativas do número de gerações anuais de *Aedes aegypti* (Diptera, Culicidae). Iheringia. Série Zool. [Internet]. 2009;99:142–8. Available from: [http://www.scielo.br/scielo.php?script=sci\\_arttext&pid=S0073-47212009000200004&lng=pt&tlng=pt](http://www.scielo.br/scielo.php?script=sci_arttext&pid=S0073-47212009000200004&lng=pt&tlng=pt)
115. Lumsden WHR. Observations on the effect of microclimate on biting by *Aedes aegypti* (L)

(Dipt.; Culicidae). J. Exp. Biol. [Internet]. 1947;24:361–73. Available from:

<http://ovidsp.ovid.com/ovidweb.cgi?T=JS&PAGE=reference&D=emcl1&NEWS=N&AN=0007037532>

116. Reinhold JM, Lazzari CR, Lahondère C. Effects of the environmental temperature on *Aedes aegypti* and *Aedes albopictus* mosquitoes: A review. *Insects*. 2018;9:1–17.
117. Atmosoedjono S, Van Peenen PFD, See R, Saroso JS. Man-biting activity of *Aedes aegypti* in Djakarta, Indonesia. *Mosq. News*. 1972;32:467–9.
118. Chadee DD, Martinez R. Landing periodicity of *Aedes aegypti* with implications for dengue transmission in Trinidad, West Indies. *J. Vector Ecol.* [Internet]. 2000;25:158–63. Available from: <http://www.ncbi.nlm.nih.gov/pubmed/11217215>
119. Ferreira-de-Brito A, Ribeiro IP, Moraes de Miranda R, Surubi Fernandes R, Silva Campos S, Barbosa da Silva KA, et al. First detection of natural infection of *Aedes aegypti* with Zika virus in Brazil and throughout South America. *Mem. Inst. Oswaldo Cruz* [Internet]. 2016;111:655–8. Available from: <http://www.sciencemag.org/news/2016/05/top-mosquito-suspect-found-infected-zika>
120. Barrera R, Amador M, Acevedo V, Beltran M, Muñoz JL. A comparison of mosquito densities, weather and infection rates of *Aedes aegypti* during the first epidemics of Chikungunya (2014) and Zika (2016) in areas with and without vector control in Puerto Rico. *Med. Vet. Entomol.* 2019;33:68–77.

121. Diallo D, Sall AA, Diagne CT, Faye O, Faye O, Ba Y, et al. Zika virus emergence in mosquitoes in Southeastern Senegal, 2011. PLoS One. 2014;9:1–8.
122. Guerbois M, Fernandez-Salas I, Azar SR, Danis-Lozano R, Alpuche-Aranda CM, Leal G, et al. Outbreak of Zika Virus Infection, Chiapas State, Mexico, 2015, and First Confirmed Transmission by *Aedes aegypti* Mosquitoes in the Americas. J. Infect. Dis. 2016;214:1349–56.
123. Dzul-Manzanilla F, Martínez NE, Cruz-Nolasco M, Gutiérrez-Castro C, López-Damián L, Ibarra-López J, et al. Arbovirus Surveillance and First Report of Chikungunya Virus in Wild Populations of *Aedes aegypti* from Guerrero, Mexico. J. Am. Mosq. Control Assoc. 2015;31:275–7.
124. Sang RC, Ahmed O, Faye O, Kelly CLH, Yahaya AA, Mmadi I, et al. Entomologic investigations of a chikungunya virus epidemic in the Union of the Comoros, 2005. Am. J. Trop. Med. Hyg. 2008;78:77–82.
125. Díaz-González EE, Kautz TF, Dorantes-Delgado A, Malo-García IR, Laguna-Aguilar M, Langsjoen RM, et al. First report of *Aedes aegypti* transmission of chikungunya virus in the Americas. Am. J. Trop. Med. Hyg. 2015;93:1325–9.
126. Urdaneta L, Herrera F, Pernalete M, Zoghbi N, Rubio-Palis Y, Barrios R, et al. Detection of dengue viruses in field-caught *Aedes aegypti* (Diptera: Culicidae) in Maracay, Aragua state, Venezuela by type-specific polymerase chain reaction. Infect. Genet. Evol. 2005;5:177–84.
